# Malpractice Liability and Defensive Medicine: A National Survey of Neurosurgeons

Brian V. Nahed<sup>1\*</sup>, Maya A. Babu<sup>2\*</sup>, Timothy R. Smith<sup>3</sup>, Robert F. Heary<sup>4</sup>

**1** Department of Neurosurgery, Massachusetts General Hospital, Boston, Massachusetts, United States of America, **2** Department of Neurological Surgery, Mayo Clinic, Rochester, Minnesota, United States of America, **3** Department of Neurological Surgery, Northwestern University, Chicago, Illinois, United States of America, **4** Department of Neurological Surgery, University of Medicine and Dentistry of New Jersey, Newark, New Jersey, United States of America

## Abstract

**Background:** Concern over rising healthcare expenditures has led to increased scrutiny of medical practices. As medical liability and malpractice risk rise to crisis levels, the medical-legal environment has contributed to the practice of defensive medicine as practitioners attempt to mitigate liability risk. High-risk specialties, such as neurosurgery, are particularly affected and neurosurgeons have altered their practices to lessen medical-legal risk. We present the first national survey of American neurosurgeons' perceptions of malpractice liability and defensive medicine practices.

**Methods:** A validated, 51-question online-survey was sent to 3344 practicing U.S. neurosurgeon members of the American Association of Neurological Surgeons, which represents 76% of neurosurgeons in academic and private practices.

**Results:** A total of 1028 surveys were completed (31% response rate) by neurosurgeons representing diverse sub-specialty practices. Respondents engaged in defensive medicine practices by ordering additional imaging studies (72%), laboratory tests (67%), referring patients to consultants (66%), or prescribing medications (40%). Malpractice premiums were considered a "major or extreme" burden by 64% of respondents which resulted in 45% of respondents eliminating high-risk procedures from their practice due to liability concerns.

**Conclusions:** Concerns and perceptions about medical liability lead practitioners to practice defensive medicine. As a result, diagnostic testing, consultations and imaging studies are ordered to satisfy a perceived legal risk, resulting in higher healthcare expenditures. To minimize malpractice risk, some neurosurgeons have eliminated high-risk procedures. Left unchecked, concerns over medical liability will further defensive medicine practices, limit patient access to care, and increase the cost of healthcare delivery in the United States.

**Citation:** Nahed BV, Babu MA, Smith TR, Heary RF (2012) Malpractice Liability and Defensive Medicine: A National Survey of Neurosurgeons. PLoS ONE 7(6): e39237. doi:10.1371/journal.pone.0039237

**Editor:** Laxmaiah Manchikanti, University of Louisville, United States of America

**Received:** April 22, 2012; **Accepted:** May 22, 2012; **Published:** June 22, 2012

**Copyright:** © 2012 Babu et al. This is an open-access article distributed under the terms of the Creative Commons Attribution License, which permits unrestricted use, distribution, and reproduction in any medium, provided the original author and source are credited.

**Funding:** The authors have no funding or support to report.

**Competing Interests:** The authors have declared that no competing interests exist.

\* E-mail: bnahed@partners.org (BN); babu.maya@mayo.edu (MB)

† These authors contributed equally to this work.

## Introduction

Over the past three decades, medical malpractice premiums have risen disproportionately compared to physician incomes. Between 2000 and 2002, there was a 15% rise in the cost of medical malpractice insurance while physician incomes decreased during this time [1]. Although malpractice litigation facilitates recourse against physician negligence, it also creates opportunities for frivolous lawsuits. Malpractice crises have affected many parts of the country over the past several decades, influencing the locations in which physicians practice, the types of procedures offered, and ultimately, access to healthcare. Physicians practice defensive medicine due to concern for liability risk, which contributes to an increase in healthcare expenditures. As these are politically sensitive topics, recent efforts to reform the healthcare system have largely ignored medical malpractice and tort reform. This paper is the first national survey specifically aimed at investigating the impact of liability risk perception on access to healthcare.

## History

Medical malpractice was uncommon in the United States until the 19<sup>th</sup> century [2]. Malpractice litigation emerged, in part, in response to the declining role of religion as justification for personal injury and a rising sense that physical well-being could be controlled and even improved [3–4]. As the lay press reported medical advances, patients shifted their beliefs towards a feeling that diseases were treatable. Poor outcomes were scrutinized as to whether a physician could have or should have performed better [3]. Between 1840 and 1860, the number of malpractice cases carried to state appellate courts in the United States increased over 950% and malpractice litigation jumped roughly 10-fold compared to population growth [5]. Medical journals published the first papers on malpractice around this time [6].

Three major reasons account for the increased numbers of malpractice cases since 1840. First, while medical advances improved healthcare overall, unintended side effects of treatments became fertile ground for litigation. For example, radiographs

improved diagnostic abilities but the first patients were exposed to excessive radiation doses or improper interpretation of images [7]. Second, as organizations developed uniform standards of training, licensing, and practicing, doctors could be held accountable for deviating from prescribed norms [8–9]. Finally, while the advent of malpractice insurance for physicians protected personal assets, it led to the establishment of malpractice litigation as a recognized legal instrument.

### High-Risk Specialties

Malpractice liability affects all medical practitioners. Several studies, however, have identified specific specialties that are at “high-risk” for litigation including: Emergency Medicine, General Surgery, Orthopedic Surgery, Neurosurgery, Obstetrics/Gynecology, and Radiology [10]. These specialties frequently address acute medical problems that require rapid decision-making such that a poor outcome may be unavoidable. These specialties are also predominantly procedure driven and outcomes may be scrutinized for the skill of the treating physician. Physicians who cover trauma or emergencies have increased liability secondary to the increased risk of poorer outcomes in these settings compared with elective practices [11].

The acute decision-making required to care for ill patients, the small margin for error, and the potential for adverse outcomes are some of the reasons neurosurgery is considered a “high-risk” specialty. As malpractice liability continues to be of concern, neurosurgeons have reduced practice offerings to mitigate liability exposure. In Pennsylvania, high liability premiums and large lawsuit settlements have led some neurosurgeons to avoid intracranial operations, instead performing only elective spine operations which may have less risk of a poor outcome. Fears over malpractice have helped drive neurosurgeons from the state, and created what the Chester County Medical Society declared as a medical malpractice “crisis,” which “clearly jeopardize(s) [residents and creates] a healthcare situation of extreme concern” for neurotrauma patients who could not “receive immediate, life-saving interventions due to the lack of any full-time neurosurgeon in the county.” As a result, acutely injured patients had to be transferred to facilities with neurosurgeons; in two instances, patients died during the one-hour ambulance ride from Chester County to Lancaster County, Pennsylvania [12].

In the field of obstetrics, concern for malpractice liability has led to changes in healthcare delivery. The Healthcare Cost and Utilization Project-Nationwide Inpatient Sample found that states in which malpractice premiums exceeded \$100,000 were associated with higher incidences of cesarean deliveries (odds ratio 1.17) and lower incidences of vaginal births after cesarean deliveries (odds ratio 0.60). There were also lower rates of instrumental deliveries (odds ratio 0.72) compared with states where the average malpractice premium was less than \$50,000 [13].

While the healthcare debate has focused on efforts to reduce unnecessary costs and encourage physicians to adhere to evidence-based medicine, little attention has been paid to the role of defensive medicine in exacerbating the liability crisis. This paper studies the beliefs and self-reported practices of neurosurgeons to determine how the perception of malpractice risk affects routine practice. We report the first national survey of neurosurgeons on this topic.

### Methods

A 51-question survey comprised of previously validated questions [10,14] was developed. This survey included questions on eight basic domains thought to influence defensive practices: 1) surgeon demographics 2) patient demographics 3) physician practice type 4) payment source: private insurance, Medicaid, Medicare, or TRICARE; 5) type of malpractice insurance carried; 6) changes to insurance premium rates or coverage types; 7) practitioner perceptions related to liability, and 8) practitioner behaviors in terms of ordering of laboratory tests and imaging studies. In a preliminary assessment, the survey was administered to a small group of 20 neurosurgical practitioners, and took 10 minutes on average to complete. The survey was then sent to

**Table 1. Demographic Information.**

|                                              |       |
|----------------------------------------------|-------|
| <b>1 Clinical Status</b>                     |       |
| <5 years in practice                         | 12.6% |
| 5–10 years in practice                       | 15.3% |
| 10–20 years in practice                      | 36.3% |
| 20–30 years in practice                      | 25.0% |
| >30 years in practice                        | 10.6% |
| <b>2 Gender</b>                              |       |
| Male                                         | 91.8% |
| Female                                       | 8.1%  |
| <b>3 Number of Annual Operative Cases</b>    |       |
| <50                                          | 1.0%  |
| 50–100                                       | 4.7%  |
| 100–200                                      | 24.0% |
| 200–300                                      | 38.6% |
| 300–400                                      | 21.0% |
| 400–500                                      | 7.0%  |
| >500                                         | 3.1%  |
| <b>4 Number of Lifetime Operative Case</b>   |       |
| <500                                         | 1.9%  |
| 501–1000                                     | 3.7%  |
| 1001–2000                                    | 11.3% |
| 2001–3000                                    | 17.3% |
| 3001–4000                                    | 15.7% |
| 4001–5000                                    | 12.9% |
| 5001–10,000                                  | 29.9% |
| >10,000                                      | 7.0%  |
| <b>5 Type of Practice</b>                    |       |
| Academic                                     | 23.5% |
| Private Practice                             | 30.4% |
| Mixed (Academic and Private)                 | 13.4% |
| Military                                     | 0.9%  |
| Hospital-based                               | 13.5% |
| Group Practice                               | 18.0% |
| Solo Practice                                | 6.1%  |
| <b>6 Number of Neurosurgeons in Practice</b> |       |
| Solo Practitioner                            | 14.6% |
| 1–2                                          | 16.5% |
| 3–5                                          | 24.2% |
| 6–10                                         | 20.4% |
| 11–15                                        | 11.0% |
| >15                                          | 13.1% |

doi:10.1371/journal.pone.0039237.t001

**Table 2.** Patients Served by Neurosurgeon Respondents.

| 1 Percentage of Patients Treated who Carry Commercial Insurance |       |
|-----------------------------------------------------------------|-------|
| <10%                                                            | 2.6%  |
| 10–25%                                                          | 16.9% |
| 25–50%                                                          | 37.8% |
| 50–75%                                                          | 27.3% |
| >75%                                                            | 8.0%  |
| Not known                                                       | 7.3%  |
| 2 Percentage of Patients Treated who are on Medicare            |       |
| <10%                                                            | 7.5%  |
| 10–25%                                                          | 29.7% |
| 25–50%                                                          | 46.0% |
| 50–75%                                                          | 9.3%  |
| >75%                                                            | 0.6%  |
| Not known                                                       | 6.6%  |
| 3 Percentage of Patients Treated who are on Medicaid            |       |
| <10%                                                            | 43.8% |
| 10–25%                                                          | 34.5% |
| 25–50%                                                          | 10.2% |
| 50–75%                                                          | 2.9%  |
| >75%                                                            | 0.5%  |
| Not known                                                       | 7.9%  |
| 4 Percentage of Patients Treated who are on TRICARE             |       |
| <10%                                                            | 59.5% |
| 10–25%                                                          | 8.3%  |
| 25–50%                                                          | 0.8%  |
| 50–75%                                                          | 0.1%  |
| >75%                                                            | 0.9%  |
| Not known                                                       | 7.9%  |

doi:10.1371/journal.pone.0039237.t002

all 3344 United States members of the American Association of Neurosurgeons (AANS) with a valid email address. The AANS is the largest neurosurgical society in the United States and represents 76% of neurosurgeons in academic and private practices. The survey respondents consisted of neurosurgeons in different practice settings, including: active practice; active provisional military practice; active military practice; and active provisional members. The survey was presented to the AANS members via an online survey tool and was conducted over a 6-week period. Approval from IRB and informed consent was not obtained given that this was a de-identified anonymous online survey. The purpose of this study was disclosed to the participants prior to beginning the survey.

**Results**

Of the 3344 practicing neurosurgeons registered in the AANS directory, 1028 completed the questionnaire (31% response rate). All surveys are included in the subsequent analysis. Neurosurgeons from every state in the United States except for West Virginia (n = 31, 0.9% of total AANS members) participated in this survey. The types of practices in which survey respondents practice includes private practice (30%), academics (24%), group practice (18%), hospital-based practice (14%), and “mixed practices” representing both academic and private practice (13%). The

**Table 3.** Malpractice Premiums.

| 1 Malpractice Premium as a Percentage of Gross Annual Revenue        |       |
|----------------------------------------------------------------------|-------|
| >60%                                                                 | 1.2%  |
| 50–59%                                                               | 1.6%  |
| 40–49%                                                               | 3.2%  |
| 30–39%                                                               | 6.7%  |
| 20–29%                                                               | 16.6% |
| 10–19%                                                               | 39.8% |
| <10%                                                                 | 30.6% |
| 2 Changes to Liability Premiums over the Past Three Years            |       |
| Increased >25%                                                       | 8.8%  |
| Increased >10%                                                       | 21.7% |
| No significant change                                                | 38.3% |
| Decreased >10%                                                       | 7.7%  |
| Decreased >25%                                                       | 1.1%  |
| Not known                                                            | 22.0% |
| 3 Over the Past Three Years, Average Reimbursement/CPT Code Change   |       |
| Increased >25%                                                       | 2.1%  |
| Increased >10%                                                       | 1.0%  |
| No significant change                                                | 13.7% |
| Decreased >10%                                                       | 55.8% |
| Decreased >25%                                                       | 14.3% |
| Not known                                                            | 14.8% |
| 4 Number of Claims Against Survey Respondents in Past Three Years    |       |
| Zero                                                                 | 60.7% |
| 1–2                                                                  | 34.0% |
| 3–4                                                                  | 3.7%  |
| 5–6                                                                  | 0.8%  |
| 7–8                                                                  | 0.2%  |
| 9–12                                                                 | 0.0%  |
| 13–15                                                                | 0.2%  |
| >15                                                                  | 0.2%  |
| 5 Number of Settlements Made Against Respondents over their Lifetime |       |
| 1–3                                                                  | 36.5% |
| 4–7                                                                  | 4.5%  |
| >7                                                                   | 0.4%  |
| None                                                                 | 58.0% |

doi:10.1371/journal.pone.0039237.t003

practice sizes range from solo practice (15%) to practices with greater than 15 neurosurgeons (13%).

The complete results are presented in table form. Table 1 outlines demographic information and the neurosurgical experience of respondents (gender, work status, size of practice, specialties treated, and operative case experience). Table 2 outlines the types of patients seen and demonstrates the wide impact survey respondents have on meeting the neurosurgical needs of the public. Table 3 displays information related to malpractice premiums in the context of changes to payments and malpractice premiums as a percentage of physician income. Table 4 presents the results of perception questions asked to survey respondents to determine beliefs about malpractice. Table 5 outlines responses made to a series of questions related to ordering laboratory tests, imaging studies, and requesting referrals due to defensive medicine

**Table 4.** Perceptions of Neurosurgeon Respondents.

|                                                                                               |       |
|-----------------------------------------------------------------------------------------------|-------|
| 1 "There is a medical liability crisis in my area"                                            |       |
| Strongly Agree                                                                                | 38.6% |
| Agree                                                                                         | 34.7% |
| Neutral                                                                                       | 17.4% |
| Disagree                                                                                      | 7.0%  |
| Strongly Disagree                                                                             | 2.1%  |
| 2 "Medical liability affects my decision on where, geographically, to practice neurosurgery." |       |
| Strongly Agree                                                                                | 39.1% |
| Agree                                                                                         | 32.2% |
| Neutral                                                                                       | 17.0% |
| Disagree                                                                                      | 9.0%  |
| Strongly Disagree                                                                             | 2.5%  |
| 3 "Medical liability affects my decision on how long to continue to practice neurosurgery"    |       |
| Strongly Agree                                                                                | 40.0% |
| Agree                                                                                         | 31.2% |
| Neutral                                                                                       | 16.8% |
| Disagree                                                                                      | 8.8%  |
| Strongly Disagree                                                                             | 3.0%  |
| 4 "I view every patient as a potential lawsuit."                                              |       |
| Strongly Agree                                                                                | 32.0% |
| Agree                                                                                         | 37.3% |
| Neutral                                                                                       | 12.3% |
| Disagree                                                                                      | 12.6% |
| Strongly Disagree                                                                             | 5.7%  |

doi:10.1371/journal.pone.0039237.t004

concerns. Questions regarding head trauma privileges, and the concerns associated with maintaining these, were also included.

## Discussion

This study marks the first survey identifying perceptions among neurosurgeons of malpractice liability and its impact on healthcare delivery. Malpractice liability concerns impact neurosurgical practice regardless of the type of reimbursement received or the patient population served. These concerns are widespread and affect neurosurgeons nationally from a diverse range of practice types serving varied patient populations. In our study, over 40% of survey respondents with malpractice concerns served between 25–50% Medicare and between 10–50% Medicaid funded patients.

### Scope of Concern

Practice patterns are strongly influenced by a practitioner's perception of the medico-legal environment and potential malpractice risk. Seventy-two percent of respondents "strongly agreed" or "agreed" that there is a medical liability crisis in their practice area. Furthermore, 50% of neurosurgeons cited liability premiums as a "major burden," and 14% labeled liability premiums as an "extreme burden." In a recent study, 19.1% of neurosurgeons face a malpractice claim yearly [15]. Importantly, the impact of these lawsuits is far-reaching as practice behavior is influenced by news of a high-profile lawsuit elsewhere within the medical community [16]. This pattern may have broad implications. In our survey, 41% percent of neurosurgeons reported at least one legal settlement in their career. Regardless of actual

outcomes, the threat of litigation influences how neurosurgeons utilize defensive medicine practices [18].

### Perception Changes Actions

While long perceived among physicians, this study is the first to capture the high proportions of practitioners who use defensive medicine in day-to-day patient management. Our survey revealed that 72% of respondents ordered imaging studies, 67% ordered laboratory tests, and 66% consulted other physicians solely for defensive purposes. Defensive practices are associated with increased healthcare expenditures. Several studies estimate that unnecessary costs incurred due to ordering imaging or laboratory tests primarily to lessen malpractice risk is between \$41 billion over five years [17] and \$55.6 billion in 2008.

Defensive medicine practices satisfy a theoretical legal standard over traditional medical practices; however, over time, these become the new *standard* practice. For example, patients with back pain often undergo magnetic resonance imaging (MRI) of the spine to protect for legal liability should the patient have a surgical lesion. While physicians in the past may have used a thorough history and physical to guide imaging, in this study, 72% of neurosurgeons surveyed stated that they order additional imaging studies solely to mitigate liability risk. This suggests that in reality, imaging is becoming a standard part of the initial workup.

Multiple studies have explored overuse of medical interventions, including but not limited to imaging studies and obtaining laboratory tests [19,20]. Geographic variability in use and overuse has also captured much public attention, and the often-cited

**Table 5.** Defensive Medicine Responses.

|                                                                                                    |       |
|----------------------------------------------------------------------------------------------------|-------|
| <b>1 Defensive Medicine Practices done SOLELY to Minimize Risk of a Lawsuit</b>                    |       |
| Ordered lab tests                                                                                  | 66.7% |
| Referred patients                                                                                  | 66.0% |
| Prescribed medication                                                                              | 40.0% |
| Suggested a procedure                                                                              | 36.0% |
| Ordered imaging                                                                                    | 72.0% |
| <b>2 How often do Survey Respondents Order Additional Laboratory Tests for Defensive Purposes?</b> |       |
| Always                                                                                             | 9.7%  |
| Very Often                                                                                         | 31.5% |
| Sometimes                                                                                          | 39.8% |
| Rarely                                                                                             | 15.4% |
| Never                                                                                              | 3.4%  |
| <b>3 How often do Survey Respondents Order Additional Imaging for Defensive Purposes?</b>          |       |
| Always                                                                                             | 13.0% |
| Very Often                                                                                         | 43.7% |
| Sometimes                                                                                          | 31.7% |
| Rarely                                                                                             | 9.4%  |
| Never                                                                                              | 2.2%  |
| <b>4 How often do Survey Respondents Obtain Initial Consultations for Defensive Purposes?</b>      |       |
| Always                                                                                             | 8.5%  |
| Very Often                                                                                         | 32.2% |
| Sometimes                                                                                          | 38.0% |
| Rarely                                                                                             | 17.5% |
| Never                                                                                              | 3.5%  |
| <b>5 How often do Survey Respondents Make Referrals for Defensive Purposes?</b>                    |       |
| Always                                                                                             | 6.2%  |
| Very Often                                                                                         | 26.7% |
| Sometimes                                                                                          | 42.2% |
| Rarely                                                                                             | 20.7% |
| Never                                                                                              | 4.2%  |
| <b>6 What Prompted Discontinuation of High-Risk Services?</b>                                      |       |
| Liability                                                                                          | 49.7% |
| Technical Skill Involves                                                                           | 9.2%  |
| Dislike                                                                                            | 13.8% |
| Changing Practice                                                                                  | 24.9% |
| Other                                                                                              | 2.3%  |
| <b>7 What are your Feelings on Malpractice Premiums Related to Maintaining Cranial Privileges</b>  |       |
| Very Concerned                                                                                     | 29.9% |
| Somewhat Concerned                                                                                 | 32.5% |
| Neutral                                                                                            | 19.2% |
| Somewhat Unconcerned                                                                               | 5.1%  |
| Completely Unconcerned                                                                             | 6.1%  |
| Cranial Privileges Not Maintained                                                                  | 1.7%  |
| Unknown                                                                                            | 5.1%  |
| <b>8 Greatest Concern with Maintaining Trauma Privileges</b>                                       |       |
| Reimbursement                                                                                      | 44.6% |
| Malpractice                                                                                        | 44.0% |
| Unknown                                                                                            | 10.9% |
| <b>9 Overall Burden of Liability Insurance</b>                                                     |       |
| Not a Burden                                                                                       | 9.5%  |

**Table 5. Cont.**

|                |       |
|----------------|-------|
| Minor Burden   | 26.6% |
| Major Burden   | 49.6% |
| Extreme Burden | 14.3% |

doi:10.1371/journal.pone.0039237.t005

Dartmouth Atlas project, which describes inconsistencies in procedural volume across the country, has driven several legislative changes, including language within health reform legislation [21]. Recently, several areas of medical practice, most notably cardiology, have experienced significant reimbursement changes through the Centers for Medicare and Medicaid Services, driven in part by perceptions of overuse of certain procedures and imaging studies [22].

With its emphasis on controlling costs and affecting clinical practice, many had hoped that the Affordable Care Act would tackle issues of malpractice liability and defensive medicine. Instead, the Act fell short. The Act includes provisions (1) to extend federal malpractice protections to non-medical personnel working in free clinics and (2) authorizes \$50 million over the next five years for the Department of Health and Human Service to award demonstration project grants to states to create and evaluate alternatives to the current tort litigation system for resolving disputes about injuries caused by physicians providing medical care [23]. While these direct provisions within the Act related to malpractice, additional provisions related to implementation of health reform, are feared to increase burdens placed upon physicians, and may work to exacerbate defensive medicine practices. As health reform is implemented, whether these perceptions will translate into reality will remain to be seen.

### Limiting Access to Care

Malpractice liability premiums, influenced by the services offered and the local malpractice environment, have an appreciable impact on the availability of neurosurgical care in the country. Of survey respondents, 71% “strongly agreed” or “agreed” that their chosen geographic location was influenced by medical malpractice liability concerns.

Over 50% of neurosurgeons surveyed have tailored their practice to minimize their risk of liability by eliminating “high-risk” procedures, such as those involved with traumatic head and spine injuries, intracranial hemorrhages, tumor resections, and hydrocephalus. As a result, 45% of respondents do not currently treat these high-risk conditions due to liability concerns. Further contributing to the declining number of neurosurgeons offering these high-risk procedures, 71% of neurosurgeons indicate that the malpractice environment affects their decision of how long to practice. The reduction in the number of neurosurgeons available to offer potentially life-saving procedures is magnified in a small specialty where even small limitations in access to care can have profound implications.

### Reform

States that have enacted tort reform measures have seen declines in the number of malpractice lawsuits filed and the resultant costs of medical malpractice [19]. Following the passage of Texas’ tort reform law, the prevalence of lawsuits filed per 100,000 procedures performed dropped from 40 to 8 lawsuits per 100,000 procedures before and after reform, respectively ( $p < 0.01$ ) [24]. Virtually all of the liability and defense costs were in the pre-

tort reform period: \$595,000/year versus \$515/year in the post-reform environment ( $p < 0.01$ ).

Several models have been proposed to respond to the malpractice crisis. One model incorporates physician disclosure of medical errors [25]. Other models recommend *health courts*, specialized courts with judges trained in healthcare, which are meant to limit the number of frivolous lawsuits [26]. A third model implements patient indemnity insurance to protect patients proactively against personal losses incurred from medical interventions [26]. State-based limitations on non-economic damages, such as California’s Medical Injury Compensation Reform Act (MICRA), have also been used to curb increasing malpractice costs [27].

Ultimately, regardless of the malpractice models proposed, measures to protect high-risk practitioners are necessary to assure that patients have access to high-risk, potentially life-saving procedures. Without more protective measures, defensive practices will force the standard of medical care to satisfy a theoretical legal standard meant to address perceived liability risk rather than utilize medical judgment. As the liability crisis worsens, access to key neurosurgical procedures will continue to be curtailed for at risk populations who need them most.

### Limitations

There are several limitations affecting this study. First, a survey of practitioner perceptions may differ from actual practice patterns. The results presented in this study are dependent on each individual neurosurgeon’s responses, and thus, are subject to a response bias, with respondents perhaps more concerned about liability than non-responders. Second, this survey provides information on attitudes at a single point in time; a longitudinal series of surveys would provide more information as to whether practitioners’ views have changed and how self-reported behaviors may correspondingly be altered. Third, an anonymous survey may result in more extreme responses if the subject of the survey (namely, malpractice) is a source of frustration and/or anxiety. As mentioned, while surveys may be subjected to response bias, this study sought to identify individual perceptions and the effects of these perceptions on medical practices; therefore, utilizing a survey instrument is an ideal method to identify individual attitudes and defensive medicine practices.

### Conclusion

Balancing medical oversight with limitations on malpractice is important to uphold standards of high-quality medical care and ensure physicians do not make decisions solely for fear of litigation. The survey respondents indicated that malpractice liability results in defensive medicine practices to lessen malpractice exposure. Reductions in offering “high-risk” cranial procedures have decreased access to care for potentially life-saving neurosurgical procedures. With increasing malpractice premiums and decreasing provider reimbursement, neurosurgeons have adopted defensive measures to mitigate perceived liability risk. Without reform, malpractice premiums will continue to rise, and the number of lawsuits filed frivolously or intended for financial remuneration

through settlement will go unchecked. Access to neurosurgeons and neurosurgical care will continue to be restricted which will adversely affect delivery and cost of healthcare in the United States.

## Acknowledgments

The authors wish to thank Katie O. Orrico, J.D. and the American Association of Neurological Surgeons (AANS) for assistance with contacting members. Additionally, the authors wish to recognize the support of Deborah L. Benzil M.D., Christopher C. Getch M.D., the Council of State Neurosurgical Societies (CSNS), and the Congress of

Neurological Surgeons (CNS). The authors had access to all of the data in the study and take responsibility for the integrity of the data and the accuracy of the data analysis.

## Author Contributions

Conceived and designed the experiments: MB BN RH. Performed the experiments: MB BN RH. Analyzed the data: MB BN TS RH. Contributed reagents/materials/analysis tools: MB BN RH. Wrote the paper: MB BN RH.

## References

- Office CB (2004) Limiting Tort Liability for Medical Malpractice. In: Economic and Budget Issue Brief. Washington, DC: Congressional Budget Office.
- Mohr JC (2000) American medical malpractice litigation in historical perspective. *JAMA* 283: 1731–7.
- Mohr JC (1993) Doctors and the Law: Medical Jurisprudence in Nineteenth-Century America. New York: Oxford University Press.
- Sandor AA (1957) The history of professional liability suits in the United States. *J Am Med Assoc* 163: 459–66.
- DeVille K (1990) Medical Malpractice in Nineteenth-Century America: Origins and Legacy. New York: New York University Press.
- Mohr JC (1992) The origins of medical malpractice in the United States. *Trans Stud Coll Physicians Phila* 14:1–21.
- Smith HW (1941) Legal responsibility for medical malpractice. *JAMA* 116 : 942–7, 2149–59, 490–494, 670–679, 755–768; and 117 : 23–33.
- Culbertson HE (1913) Medical Men and the Law: A Modern Treatise on the Legal Rights, Duties, and Liabilities of Physicians and Surgeons. Philadelphia: Lea & Febiger.
- Starr P (1982) The Social Transformation of American Medicine. New York: Basic Books.
- Studdert DM, Mello MM, Sage WM, DesRoches CM, Peugh J, et al. (2005) Defensive medicine among high-risk specialist physicians in a volatile malpractice environment. *JAMA* 293: 2609–17.
- Brown TW, McCarthy ML, Kelen GD, Levy F (2010) An epidemiologic study of closed emergency department malpractice claims in a national database of physician malpractice insurers. *Acad Emerg Med* 17: 553–60.
- Guadagnino C (2005) Pennsylvania Neurosurgeon Supply. In: *Physician's News Digest*.
- Zwecker P, Azoulay L, Abenheim HA (2011) Effect of fear of litigation on obstetric care: a nationwide analysis on obstetric practice. *Am J Perinatol* 28 : 277–84.
- Mello MM, Studdert DM, DesRoches CM, Peugh J, Zapert K, et al. (2005) Effects of a malpractice crisis on specialist supply and patient access to care. *Ann Surg* 242 : 621–8.
- Jena AB, Seabury S, Lakdawalla D, Chandra A (2011) Malpractice risk according to physician specialty. *N Engl J Med*; 365 : 629–36.
- Krist AH, Woolf SH, Johnson RE (2007) How physicians approach prostate cancer screening before and after losing a lawsuit. *Ann Fam Med* 5 : 120–5.
- Rubin RJ, Mendelson DN (1994) How much does defensive medicine cost? *J Am Health Policy* 4:7–15.
- Mello MM, Chandra A, Gawande AA, Studdert DM (2010) National costs of the medical liability system. *Health Aff (Millwood)* 29: 1569–77.
- Korenstein D, Falk R, Howell EA, Bishop T, Keyhani S (2012) Overuse of health care services in the United States: an understudied problem. *Arch Intern Med*. Jan 23; 172 (2) : 171–8.
- Keyhani S, Falk R, Bishop T, Howell E, Korenstein D (2012) The relationship between geographic variations and overuse of healthcare services: a systematic review. *Med Care*. Mar 50 (3) : 257–59.
- Garg PP, Landrum MB, Normand SL, Ayanian JZ, Hauptman PJ, et al. (2002) Understanding individual and small area variation in the underuse of coronary angiography following acute myocardial infarction. *Med Care*. 40 (7) : 614–26.
- Lowe R (2010) Cardiologists tightening their belts, ACC survey suggests. *Heart Wire*. Oct 8.
- Arvantes J (2010) Health Care Reform Law Fails to Provide Remedies for Medical Malpractice. *AAFP News Now*. October 20.
- Stewart RM, Geoghegan K, Myers JG, Sirinek KR, Corneille MG, et al. (2011) Malpractice risk and cost are significantly reduced after tort reform. *J Am Coll Surg* 212: 463–7, 7 e1–42; discussion 7–9.
- Helmchen LA, Richards MR, McDonald TB (2010) How does routine disclosure of medical error affect patients' propensity to sue and their assessment of provider quality? Evidence from survey data. *Med Care* 48: 955–61.
- Scarow A (2008) Tort Reform: Alternative Models. *Clinical Neurosurgery* 55: 121–5.
- Evans MB (2004) Analysis of California's Medical Injury Compensation Review Act (MICRA). *J Med Pract Manage* 19: 329–30.
